# Supplementary material for: Effects of Exergaming in Patients with Cardiovascular Disease Compared to Conventional Cardiac Rehabilitation: A Systematic Review and Meta-Analysis
Source: MDPI journal article supplement (doi:10.3390/ijerph19063492), 2022-03-15
Supplement: s1 [file s1]

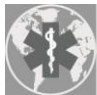

## Supplementary Material

### Electronic database search.

(1) Patients: "heart fail\*" OR "cardiac fail\*" OR "failing heart\*" OR "myocardial insufficiency" OR "myocardial fail\*" OR "failing myocard\*" OR "failure myocard\*" OR "heart decompensation" OR "impaired myocardial function" OR "reduced myocardial function" OR HFrEF OR HFpEF OR hypertension OR "myocardial infarction" OR "ischemic heart disease" OR "cardiovascular disease\*" OR CVD OR "coronary heart disease" OR "coronary artery disease" OR "coronary artery bypass grafting" OR "acute coronary syndrome" OR "percutaneous coronary intervention" OR atherosclerosis OR "angina pectoris" OR "heart disease\*" OR "cardiac rehab\*"

(2) Interventions: game\* OR videogame\* OR exergam\* OR gami\* OR "virtual reality" OR "virtual rehab\*" OR "augmented reality" OR ludic OR Wii OR Kinect OR "virtual environment\*" OR "virtual world\*" OR "virtual therap\*"

(3) #1 AND #2
